# Supplementary material for: Prognostic landscape of tumor-infiltrating immune cells and immune-related genes in the tumor microenvironment of gastric cancer
Source: publisher site journal article supplement (doi:10.18632/aging.103519), 2020-09-23
Supplement: Supplementary file [file aging-v12i18-103519-supplementary-material-SD2.pdf]

## SUPPLEMENTARY TABLE

**Supplementary Table 2. Composition of TIICs in different stages of gastric cancer.**

| <b>TIICs</b>                              | <b>Gastric cancer</b> | <b>Stage I</b> | <b>Stage II</b> | <b>Stage III</b> | <b>Stage IV</b> |
|-------------------------------------------|-----------------------|----------------|-----------------|------------------|-----------------|
| Naive B cells                             | 0.060435              | 0.04518        | 0.064665        | 0.06292          | 0.056648        |
| Memory B cells                            | 0.011808              | 0.00851        | 0.010541        | 0.013629         | 0.008848        |
| Plasma cells                              | 0.013114              | 0.01596        | 0.012274        | 0.011375         | 0.019927        |
| CD8 <sup>+</sup> T cells                  | 0.134547              | 0.126714       | 0.137343        | 0.143324         | 0.115744        |
| Naive CD4 <sup>+</sup> T cells            | 0.0001                | 0              | 0               | 0                | 0.000989        |
| Resting memory CD4 <sup>+</sup> T cells   | 0.164883              | 0.163031       | 0.151987        | 0.167391         | 0.190702        |
| activated memory CD4 <sup>+</sup> T cells | 0.043826              | 0.045551       | 0.038578        | 0.04878          | 0.038844        |
| T follicular helper cells                 | 0.02115               | 0.016063       | 0.023463        | 0.023315         | 0.019258        |
| Treg cells                                | 0.068071              | 0.065053       | 0.076524        | 0.070416         | 0.054654        |
| Gamma delta T cells                       | 0.003393              | 0.001758       | 0.002024        | 0.003686         | 0.003976        |
| Resting NK cells                          | 0.017307              | 0.023442       | 0.014708        | 0.01532          | 0.025292        |
| Activated NK cells                        | 0.019013              | 0.023218       | 0.020494        | 0.019989         | 0.007192        |
| Monocytes                                 | 0.007745              | 0.007451       | 0.006625        | 0.007135         | 0.007901        |
| M0 macrophages                            | 0.128218              | 0.163447       | 0.137092        | 0.115204         | 0.122443        |
| M1 macrophages                            | 0.073627              | 0.063678       | 0.072022        | 0.079088         | 0.070016        |
| M2 macrophages                            | 0.117545              | 0.108058       | 0.116887        | 0.113737         | 0.122498        |
| Resting dendritic cells                   | 0.021736              | 0.010988       | 0.027527        | 0.022215         | 0.019511        |
| Activated dendritic cells                 | 0.013182              | 0.013092       | 0.014284        | 0.013338         | 0.013465        |
| Resting mast cells                        | 0.031781              | 0.021085       | 0.034657        | 0.033436         | 0.025814        |
| Activated mast cells                      | 0.028294              | 0.047219       | 0.023785        | 0.021637         | 0.044962        |
| Eosinophils                               | 0.004262              | 0.003541       | 0.002269        | 0.00221          | 0.00769         |
| Neutrophils                               | 0.015961              | 0.026962       | 0.012249        | 0.011856         | 0.023628        |
